# Supplementary material
Source: Springer Nature journal article supplement (https://www.springermedizin.de/resource/supplementary/12885_2011_2791_MOESM2_ESM.pdf/9462002)

**A**

PDGF-BB 50 ng/ml    -   +   +   +   +   +  
 E7080 ( $\mu$ M)        -   -   0.01 0.1   1   10

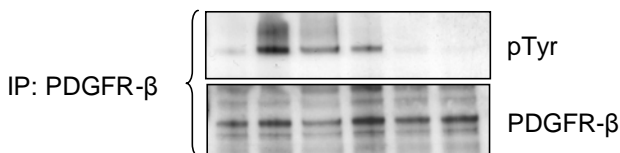**B**

PDGF-BB 50 ng/ml    -   +   +   +   +   +  
 E7080 ( $\mu$ M)        -   -   0.01 0.1   1   10

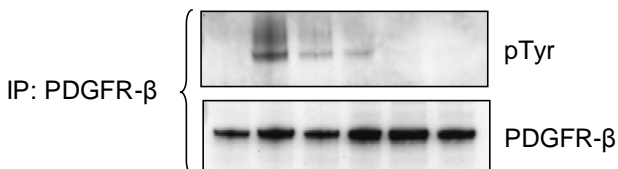**C**

bFGF (100 ng/ml)    -   +   +   +   +   +  
 E7080 ( $\mu$ M)        -   -   0.01 0.1   1   10

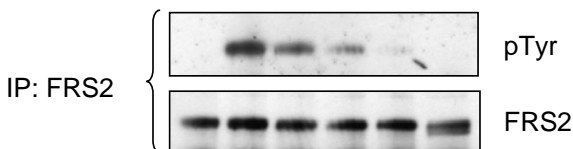**D**

bFGF (100 ng/ml)    -   +   +   +   +   +  
 E7080 ( $\mu$ M)        -   -   0.01 0.1   1   10

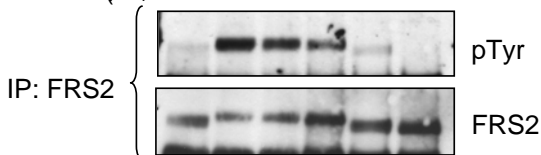**E**

VEGF 20 ng/ml       -   +   +   +   +   +  
 E7080 ( $\mu$ M)        -   -   0.01 0.1   1   10

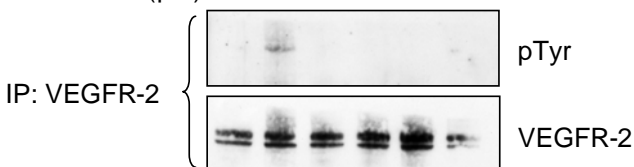

Supplement: MOESM2 [file 9462002]
